# Supplementary material for: Water-induced reversible phase transformation between cesium lead halide perovskite nanocrystals enables fluorescent anti-counterfeiting
Source: Royal Society of Chemistry journal article supplement (doi:10.1039/d2tc01087a), 2022-01-01
Supplement: d2tc01087a1.pdf [file d2tc01087a1.pdf]

## *Supporting Information*

### **Water-Induced Reversible Phase Transformation between Cesium Lead Halide Perovskite Nanocrystals Enabling Fluorescent Anti-Counterfeiting**

Haiyan Zhao,<sup>a</sup> Tianyu Lin,<sup>a</sup> Shuchen Shi,<sup>a</sup> Wenhai Bai,<sup>a</sup> Tongtong Xuan,<sup>\*ab</sup>  
Tianliang Zhou,<sup>ab</sup> and Rong-Jun Xie<sup>\*abc</sup>

<sup>a</sup>Fujian Key Laboratory of Materials Genome, College of Materials, Xiamen University, No. 422, Siming South Road, Xiamen 361005, China

<sup>b</sup>Shenzhen Research Institute of Xiamen University, No. 19, Gaoxin South Fourth Road, Nanshan District, Shenzhen 518000, China

<sup>c</sup>State Key Laboratory of Physical Chemistry of Solid Surface, Xiamen 361005, China

Email: ttxuan@xmu.edu.cn (Xuan T.T.); rjxie@xmu.edu.cn (Xie R.-J.)

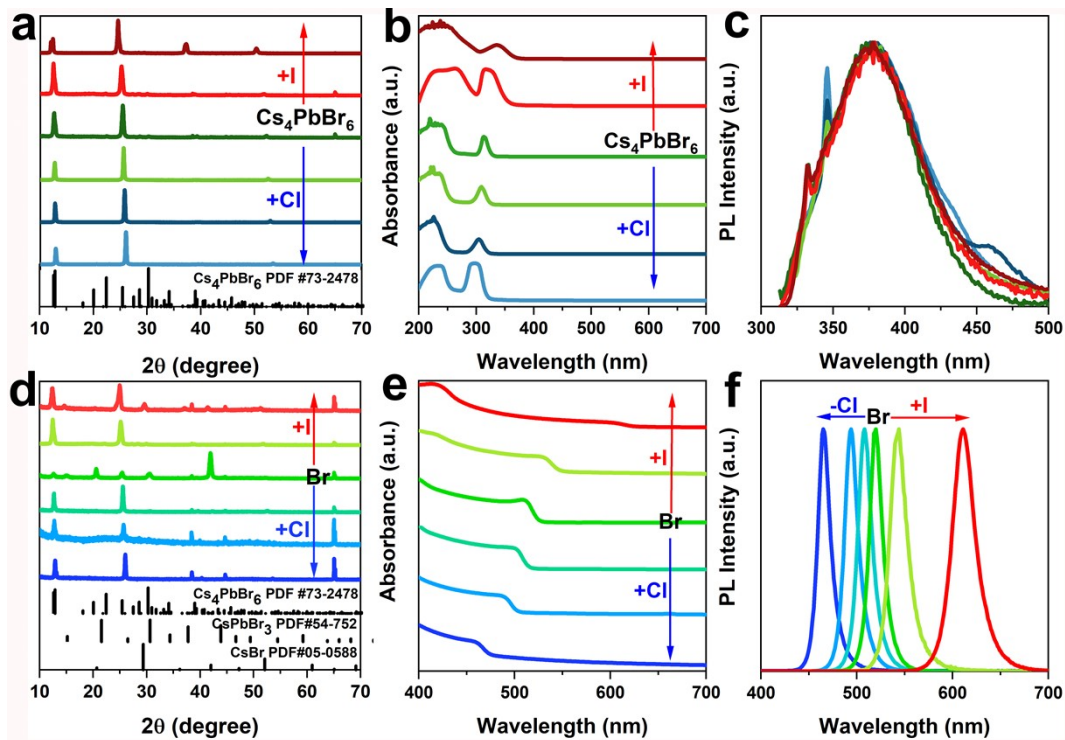

**Fig. S1** (a) XRD patterns, (b) absorption spectra, and (c) PL spectra of the  $\text{Cs}_4\text{PbX}_6$  films with different halide compositions. The detailed formulas of the synthesized  $\text{Cs}_4\text{PbX}_6$  NCs are  $\text{Cs}_4\text{PbCl}_{3.6}\text{Br}_{2.4}$ ,  $\text{Cs}_4\text{PbCl}_{2.4}\text{Br}_{3.6}$ ,  $\text{Cs}_4\text{PbCl}_{1.2}\text{Br}_{4.8}$ ,  $\text{Cs}_4\text{PbBr}_6$ ,  $\text{Cs}_4\text{PbBr}_{3.6}\text{I}_{2.4}$ , and  $\text{Cs}_4\text{PbBr}_{2.4}\text{I}_{3.6}$  from bottom to top. (d) XRD patterns, (e) absorption spectra, and (f) PL spectra of the  $\text{CsPbX}_3/\text{Cs}_4\text{PbX}_6$  films.

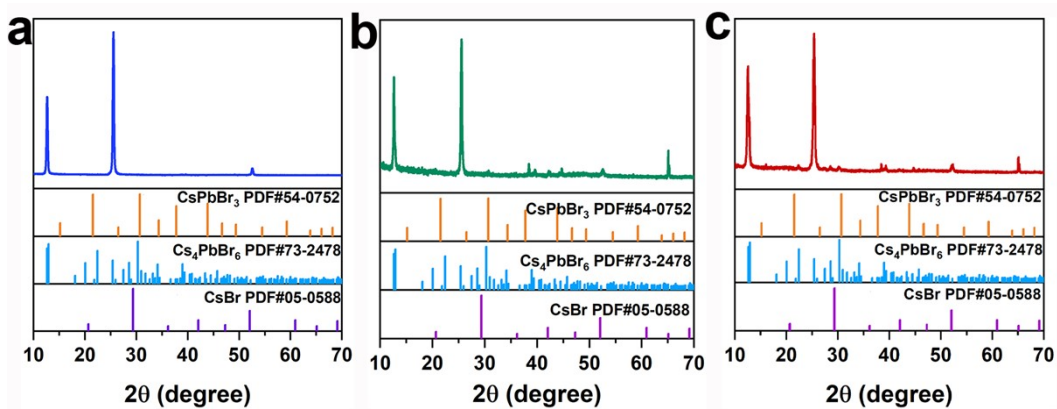

**Fig. S2** XRD pattern of  $\text{Cs}_4\text{PbBr}_6$  NC films: (a) before treatment, (b) after water vapor treatment, and (c) after vacuum drying.

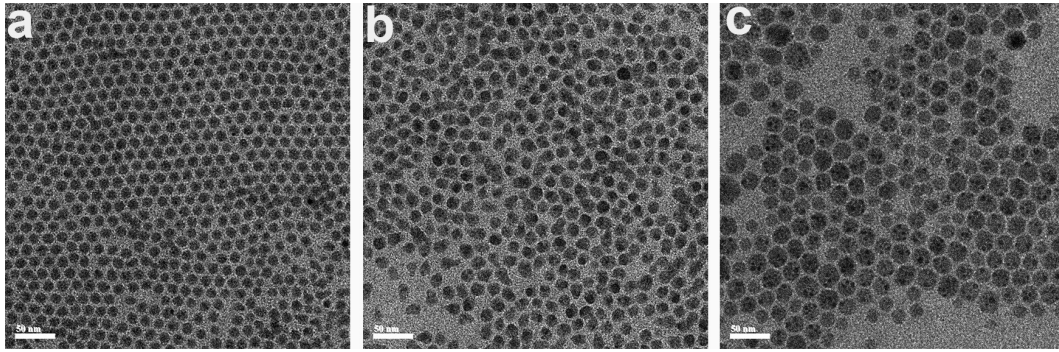

**Fig. S3** TEM images of  $\text{Cs}_4\text{PbBr}_6$  NCs: (a) before treatment, (b) after water vapor treatment, and (c) after vacuum drying.

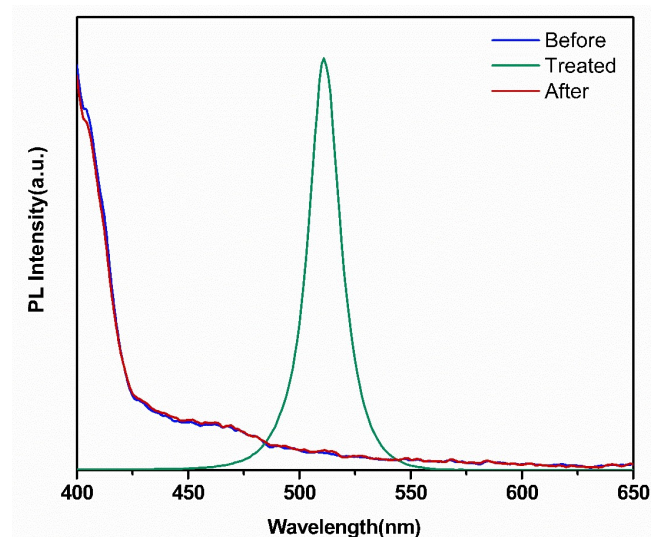

**Fig. S4** Photoluminescence spectra of the  $\text{Cs}_4\text{PbBr}_6$  NC film based on the logo of Xiamen University under 365 nm excitation: (a) before treatment, (b) water vapor treatment, and (c) vacuum drying.

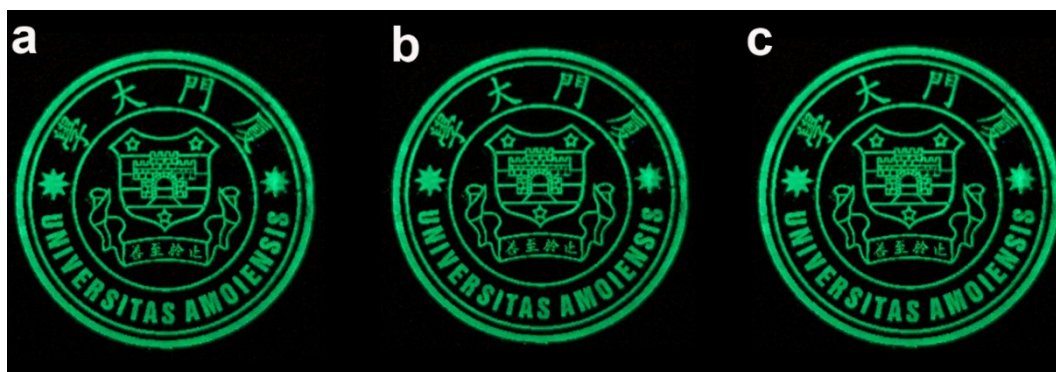

**Fig. S5** Photographs of the logo of Xiamen University under 365 nm UV light after (a) 1, (b) 10, and (c) 20 consecutive switching cycles.

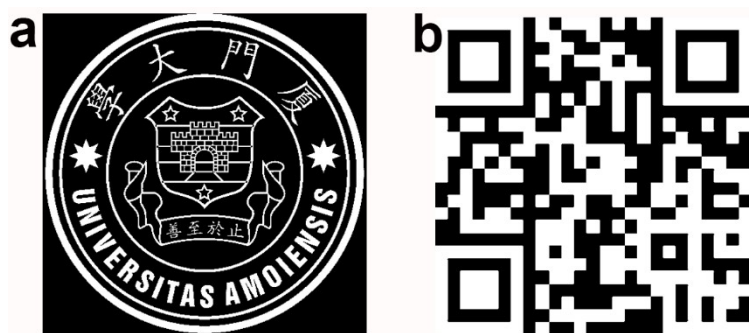

**Fig. S6** Original patterns for printing: (a) logo of Xiamen University, (b) QR codes from [en.xmu.edu.cn](http://en.xmu.edu.cn).

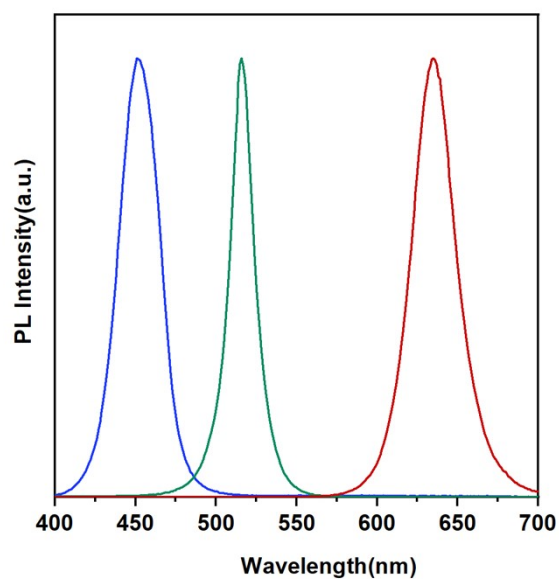

**Fig. S7** Emission spectra of  $\text{Cs}_4\text{PbCl}_{3.6}\text{Br}_{2.4}$ ,  $\text{Cs}_4\text{PbBr}_6$ , and  $\text{Cs}_4\text{PbBr}_{3.6}\text{I}_{2.4}$  NCs films based on logos of Xiamen University after being treated with water vapor.

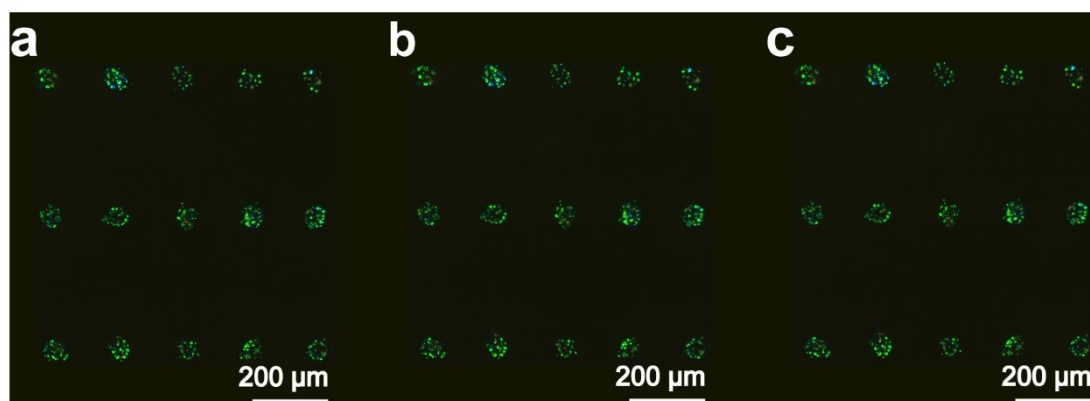

**Fig. S8** Fluorescence microscope photographs of the  $\text{Cs}_4\text{PbBr}_6$  NC-based patterns under 365 nm UV light after (a) 1, (b) 10, and (c) 20 consecutive switching cycles.

**Table S1.** Summary of the average thickness of each perovskite pixels

| Perovskite Films                               | The Average Thickness of Each Pixels ( $\mu\text{m}$ ) |         |        |        |        |
|------------------------------------------------|--------------------------------------------------------|---------|--------|--------|--------|
| $\text{Cs}_4\text{PbBr}_6$ NCs                 | 0.2401                                                 | 0.1162  | 0.1159 | 0.1212 | 0.1211 |
|                                                | 0.2744                                                 | 0.2903  | 0.3167 | 0.1893 | 0.1677 |
| $\text{CsPbBr}_3/\text{Cs}_4\text{PbBr}_6$ NCs | 0.0869                                                 | 0.00971 | 0.0969 | 0.0943 | 0.1694 |
|                                                | 0.2450                                                 | 0.2620  | 0.3432 | 0.1426 | 0.2512 |
